# Supplementary material
Source: PubMed Central journal article supplement (PMC3499626)
Supplement: NIHMS402637-supplement-01.pdf [file NIHMS402637-supplement-01.pdf]

## Supplemental Tables

**Table S1. Genome Amplification Break Points in Replicates of Vaccinia Virus near K3L, Related to Figure 2**

| breakpoint                  | K4L break | K2L break | A*      | B*      | C*      | parent*** |
|-----------------------------|-----------|-----------|---------|---------|---------|-----------|
| 1                           | 31,725    | 30,296    | 1,757   | 2       | 3       | 0         |
| 2                           | 31,573    | 28,284**  | 0       | 338     | 1       | 0         |
| 3                           | 30,837    | 30,284    | 6       | 2,444   | 1,938   | 0         |
| 4                           | 30,840    | 30,287    | 5       | 2,269   | 202     | 0         |
| <b>total aligned reads:</b> |           |           | 4.5E+06 | 5.9E+06 | 3.7E+06 | 1.7E+06   |

break = breakpoint coordinate in reference genome (K2L ORF 29204..30313, K4L ORF 30681..31955)

\* number of sequencing reads with breakpoint (multiplexed sequencing run)

\*\* breakpoint occurs upstream of K2L ORF in K1L

\*\*\* parent strain was sequenced separately from the passage 10 replicates

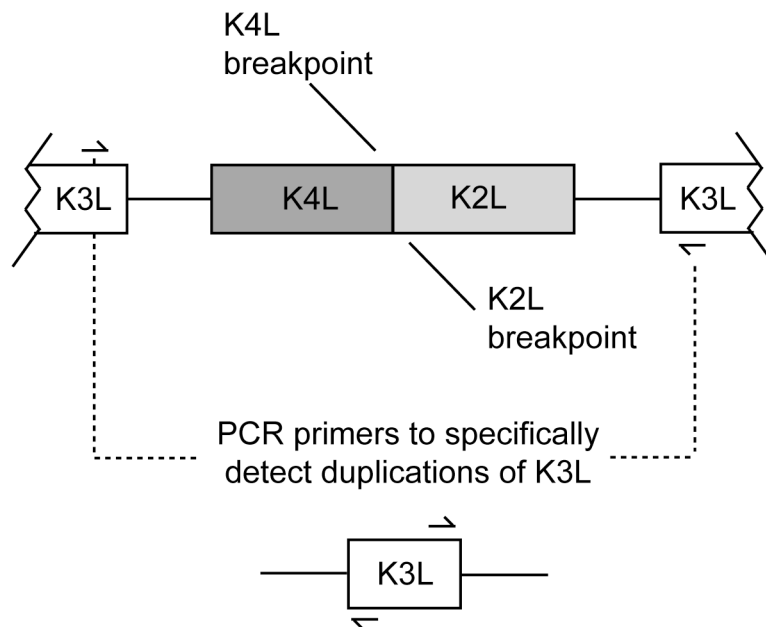

**Table S2. Polymorphisms in Vaccinia Virus Populations from Experimental Evolution, Related to Figure 2**

| <b>gene</b> | <b>variant</b> | <b>sub.</b> | <b>parent*</b> | <b>A*</b>        | <b>B*</b>         | <b>C*</b>         |
|-------------|----------------|-------------|----------------|------------------|-------------------|-------------------|
| K3L         | H47R           | T to C      | 0/917<br>(0%)  | 148/5510<br>(3%) | 4/7627<br>-       | 541/4687<br>(12%) |
| E9L         | E495G          | T to C      | 0/825<br>(0%)  | 9/1818<br>-      | 11/2383<br>-      | 923/1475<br>(63%) |
| H2R         | syn            | C to T      | 0/631<br>(0%)  | 12/1693<br>-     | 905/2338<br>(39%) | 11/1368<br>-      |

syn = synonymous substitution

\* Showing a ratio of reads with the polymorphism to total reads. A 1% frequency cut-off was used to account for potential barcode misassignment in the multiplexed sequencing run with replicates A-C.

**Table S3. Duplication-Specific Primers at Locations across Vaccinia Genomes, Related to Figure 5**

| <b>ORF</b> | <b>Forward primer</b>                         | <b>Coord.*</b>      | <b>Reverse primer</b>                               | <b>Coord.*</b>      |
|------------|-----------------------------------------------|---------------------|-----------------------------------------------------|---------------------|
| C20L**     | GAT AGG TTC GAC ATT<br>CAG AAA GAC G          | 6,874-<br>6,850     | GTT GAA GGT AAG<br>TGT GTA ACC GC                   | 7,093-<br>7,115     |
| C3L        | CTC CAG GAA ATA CAT<br>GGA AGC CG             | 21,806-<br>21,784   | CGC ATC CTA TTC<br>CCA ACA ATG TC                   | 22,503-<br>22,525   |
| K3L        | GGG ATA AAC TGG<br>TAG GGA AAA CTG TAA<br>AAG | 30,466-<br>30,437   | CAG AGT GAG GAT<br>AGT CAA AAA GAT<br>AAA TGT ATA G | 30,521-<br>30,554   |
| F13L       | GAG ATT GGG TAT CTA<br>GCC ACA GTA            | 44,001-<br>43,978   | TTC TAC CAG CCT<br>ACA TTT TGC TCC                  | 45,029-<br>45,052   |
| I7L        | CGT ATG GAA AAA<br>TGG ACC AAA AAG TC         | 68,886-<br>68,861   | CAT CTA TAT TGC<br>TAC ATA ATC CAG<br>CTA GTG       | 69,963-<br>69,992   |
| J2R        | GAT ATG TAT CAA TCG<br>GTG TGT AGA AAG TG     | 84,344-<br>84,372   | CTG TAC TTT TAC<br>CTG AAA ACA TGG GG               | 83,912-<br>83,887   |
| D5R        | GCC AAT GTT AGT GAT<br>GAA TAT CTG CA         | 103,718-<br>103,743 | CCT CGA TAA TAA<br>AAT CTT GAA TAG<br>CCG T         | 101,696-<br>101,669 |
| A4L        | GGG CAA TAG ATC<br>AAA TTC TAC AAC TAG<br>T   | 116,480-<br>116,453 | GGT GTA GAG GAT<br>TCT GCC AGC                      | 117,221-<br>117,241 |
| A29L       | AAG CAT TGT CTG ATG<br>CGT GTA A              | 139,824-<br>139,803 | GTT CGA GTT CAA<br>CGA CGA TTG A                    | 140,644-<br>140,665 |
| A52R       | GGA GAA ATG AGA<br>AAC TGT TTT CTA GAT<br>GG  | 158,199-<br>158,227 | TTT CCC TCC TAG<br>TAG TCA CCG                      | 157,820-<br>157,800 |
| B20R       | GAA ACA CAA GAT CAA<br>AGT ACA CAA CAC A      | 179,645-<br>179,672 | TCG GTG AGA TAC<br>AAA TAC CTA GAT<br>AGT C         | 179,343-<br>179,316 |

\* 'L' ORFs coordinate numbers based on complement sequence, Copenhagen strain

\*\* same for B26R (coordinates 184,864-184,888; 184,645-184,623)

**Table S4. Sequenced Duplications in Vaccinia Strains, Related to Figure 5**

| <b>ORF (strain)</b>  | <b>'right' break*</b> | <b>'left' break*</b> | <b>Fully duplicated ORFs</b> |
|----------------------|-----------------------|----------------------|------------------------------|
| C20L (WR)            | 7,345                 | 6,659                | C20L                         |
| C3L (WR)             | 22,675                | 21,741               | C3L                          |
| K3L (WR)             | 30,738                | 30,261               | K3L                          |
| K3L (WR)             | 30,587                | 30,399               | -                            |
| B20R (VC2)           | 179,726               | 179,121              | B20R                         |
| B20R ( $\Delta$ E3L) | 179,905               | 179,025              | B20R                         |
| B26R** (WR)          | 185,174               | 184,579              | B26R                         |

\* genomic coordinates from vaccinia Copenhagen reference (Genbank M35027)

\*\* same as C20L region in reverse orientation

**Table S5. Nonrecurring Genomic Break Points Consistent with Duplications, Related to Figure 5**

| <b>virus strain</b> | <b>'right' break*</b> | <b>'left' break*</b> | <b>inferred duplicated ORFs</b>    |
|---------------------|-----------------------|----------------------|------------------------------------|
| ΔE3L parent         | 156,405               | 143,153              | A35R - A49R                        |
| ΔE3L parent         | 162,444               | 22,338               | large genomic block                |
| A                   | 31,413                | 30,525               | -**                                |
| A                   | 67,627                | 66,482               | -***                               |
| A                   | 104,930               | 34,700               | large genomic block                |
| A                   | 107,526               | 107,330              | -                                  |
| B                   | 29,837                | 22,298               | C1L, N1L, N2L, M1L, M2L, K1L       |
| B                   | 47,387                | 24,975               | N2L, M1L, M2L, K1L-K7L, F1L-F17L** |
| B                   | 47,467                | 25,066               | N2L, M1L, M2L, K1L-K7L, F1L-F17L** |
| B                   | 55,156                | 55,104               | -                                  |
| B                   | 141,790               | 141,697              | -                                  |
| B                   | 169,683               | 168,828              | B7R                                |
| C                   | 24,505                | 23,524               | -                                  |
| C                   | 90,475                | 87,550               | 'H orf A'***                       |
| C                   | 104,395               | 104,298              | -                                  |
| C                   | 167,515               | 89,039               | large genomic block                |
| C                   | 171,274               | 100,726              | large genomic block                |

\* genomic coordinates from vaccinia Copenhagen reference (Genbank M35027)

\*\* includes K3L

\*\*\* confirmed by PCR and sequencing

**Table S6. Vaccinia Virus Genome Comparison between  $\Delta$ E3L and Copenhagen Reference Strain (Genbank M35027), Related to Figure 2**

| <b>Coordinate (bp)</b> | <b>Copenhagen nucleotide</b> | <b><math>\Delta</math>E3L nucleotide</b> | <b>Variant freq (%)</b> | <b>Gene</b> | <b>Variant</b> |
|------------------------|------------------------------|------------------------------------------|-------------------------|-------------|----------------|
| 16,033                 | A                            | G                                        | 98.6                    | intergenic  | -              |
| 23,443                 | C                            | T                                        | 99.8                    | C2L         | syn            |
| 24,256                 | G                            | C                                        | 100.0                   | C1L         | syn            |
| 25,525                 | G                            | C                                        | 100.0                   | N2L         | P121R          |
| 35,080-1               | CG                           | GC                                       | 99.3                    | F3L         | T313S          |
| 44,312                 | A                            | G                                        | 99.6                    | F13L        | syn            |
| 46,742-3               | CG                           | GC                                       | 99.2                    | F16L        | R10A           |
| 77,258                 | A                            | T                                        | 99.9                    | G7L         | V348E          |
| 81,834                 | G                            | A                                        | 99.6                    | L3L         | L1384F         |
| 85,139                 | T                            | C                                        | 99.8                    | J3R         | V209A          |
| 104,656                | C                            | T                                        | 99.5                    | D6R         | T180M          |
| 114,376                | -                            | C                                        | 88.4                    | intergenic  | -              |
| 145,839                | T                            | A                                        | 97.2                    | intergenic  | -              |
| 148,904                | A                            | T                                        | 99.7                    | A41L        | syn            |
| 152,699                | -                            | C                                        | 81.2                    | A46R        | frameshift     |

syn = synonymous substitution
